# Supplementary material
Source: PubMed Central journal article supplement (PMC7707183)
Supplement: supp_RA120001023_162055_1_supp_588609_qfx4yj.pdf [file supp_RA120001023_162055_1_supp_588609_qfx4yj.pdf]

## Supplemental material

**Supplemental Table S1.** Fibulin-5: scores of the 5 top models generated by I-TASSER

| <b>Model number</b> | <b>C-Score</b> |
|---------------------|----------------|
| 1                   | -2.25          |
| 2                   | -2.62          |
| 3                   | -3.23          |
| 4                   | -3.18          |
| 5                   | -3.16          |

**Supplemental Table S2.** CONSRANK scores for protein-protein interaction models

|          | <b>Fibulin-5</b>              | <b>CONSrank score</b> |
|----------|-------------------------------|-----------------------|
| <b>1</b> | complex.3.pdb                 | 0.23617               |
| <b>2</b> | complex.6.pdb                 | 0.23535               |
|          | <b>Fibronectin</b>            | <b>CONSrank score</b> |
| <b>1</b> | complex.6.pdb                 | 0.26607               |
| <b>2</b> | complex.5.pdb                 | 0.26143               |
|          | <b><math>\beta</math>2GPI</b> | <b>CONSrank score</b> |
| <b>1</b> | complex.8.pdb                 | 0.22286               |
| <b>2</b> | complex.4.pdb                 | 0.21636               |

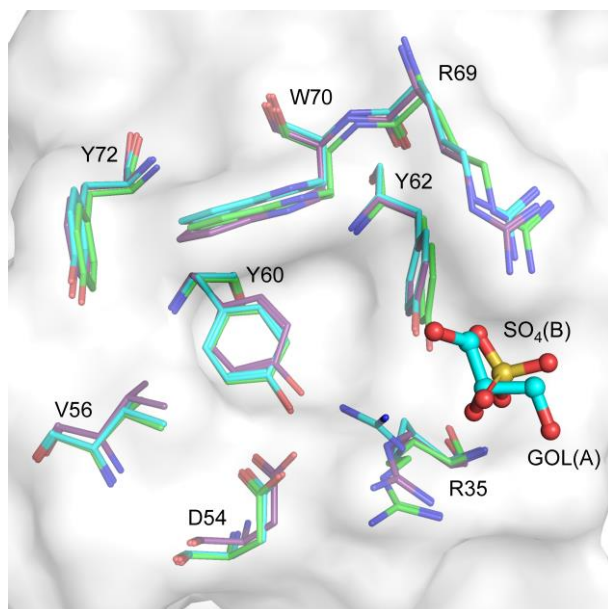

**Supplemental Figure 1** Superposition of the three monomers of the asymmetric Unit of KIV-2. Key residues making up each monomer LBS are represented as sticks (chain A in cyan, chain B in green and chain C in purple) and as a surface (grey). The ligands SO<sub>4</sub> and glycerol (GOL) are represented as balls and sticks.

(a)

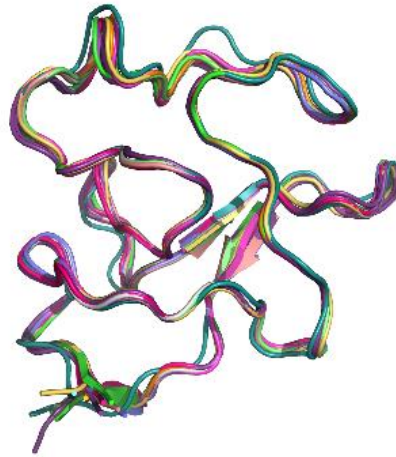

(b)

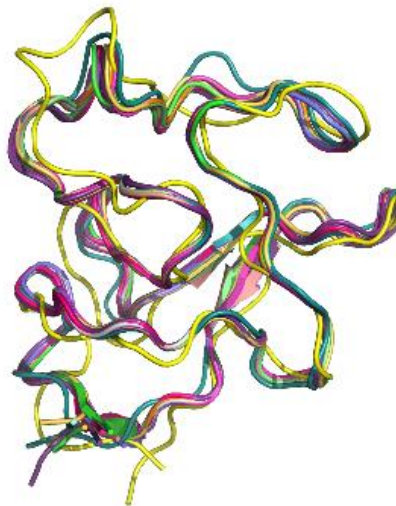

**Supplemental Figure 2.** Superposition of the structures of KIV-7 (PDB ID: 4BVW, light purple), KIV-8 (PDB ID: 2FEB, yellow), KIV-10 (PDB IDs: 1KIV, 3KIV, 4BVD, 4BVC, 4BV7, in pink, light pink, light green, orange, purple, respectively) and KV (PDB ID: 4BVV, forest green). For KIV-7 and KIV-10, structures both with and without bound ligands are shown. (a) Without KIV-8; (b) with KIV-8 (randomly chosen model from the NMR ensemble, in yellow).

## Stride Visual Assignment

### Legend of secondary structure icons:

-  H Alpha-Helix
-  T Turn
-  E Extended Configuration (Beta-sheet)
-  C or " Coil
-  B Isolated Beta Bridge
-  G 3-10 Helix
-  b Isolated Beta Bridge (Type 3 Fig 4.cd)
-  I P-Helix

### Residue Information: (point on the structure of a residue to get the detailed assignment information)

| Residue name | Chain | Pdb residue # | Ordinal residue # | One letter code | Structure | Phi angle | Psi angle | Solvent accessible area |
|--------------|-------|---------------|-------------------|-----------------|-----------|-----------|-----------|-------------------------|
| TYR          | A     | 83            | 72                | E               | Strand    | -66.75    | 154.75    | 84.6                    |

Save assignment as [sdf](#) image.  
(Right click -> save link target as..)

### Chain: A

I C Y H G N G Q S Y R G T Y S I T T V T G R T C Q A W S S M T P H S H S R T P E Y Y P N A G L I M N Y C 50  
51 R N P D A V A A P Y C Y T R D P G V R W E Y C N L T Q C 78

links to other protein structure servers for novel structure: [SCOP](#) - [CAIH](#) - [PDBSum](#) - [MSD](#)

Supplemental Figure 3. Secondary structure of KIV-2, from Stride [1].

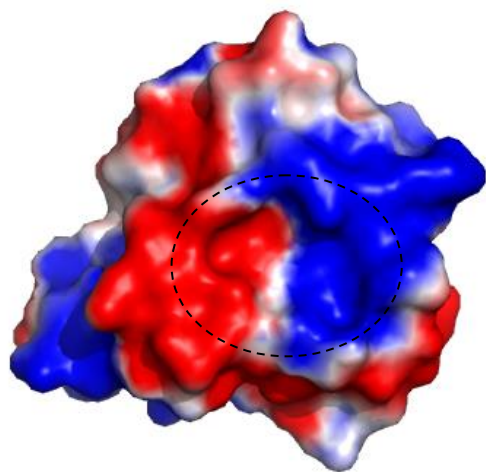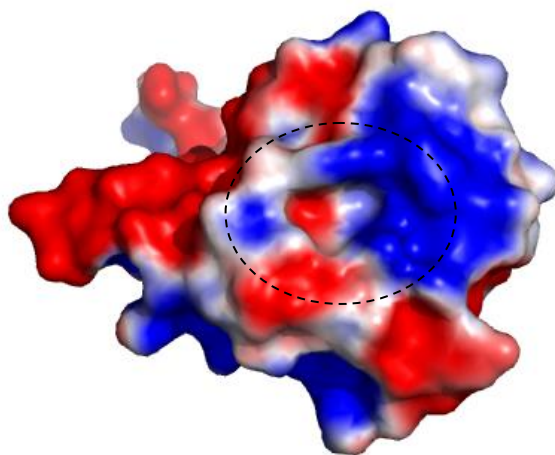

**Supplemental Figure 4** Electrostatic potentials generated by PyMol: KIV-10 (top, PDB ID: 1KIV) and KIV-2 (bottom, PDB ID: 6RX7, chain A). Encircled with a dashed line is the LBS. Red: negatively charged surface. Blue: positively charged surface.

(a)

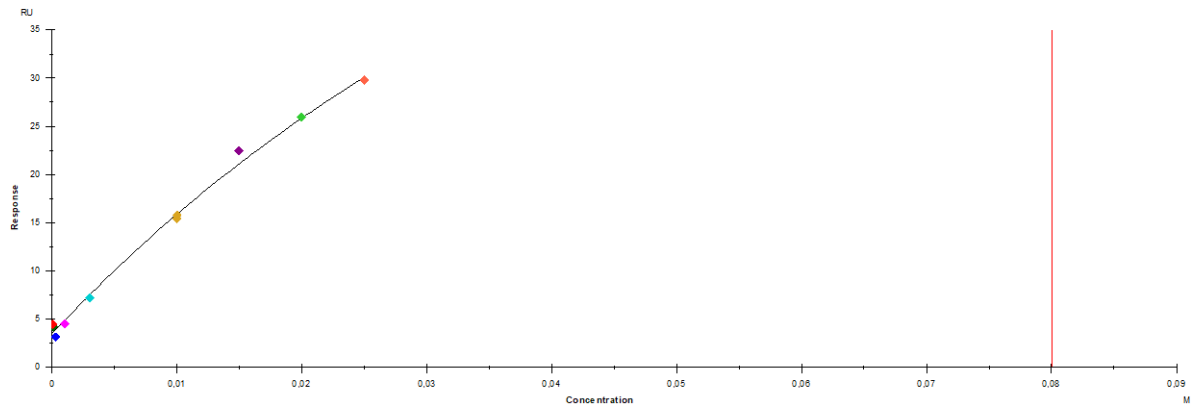

(b)

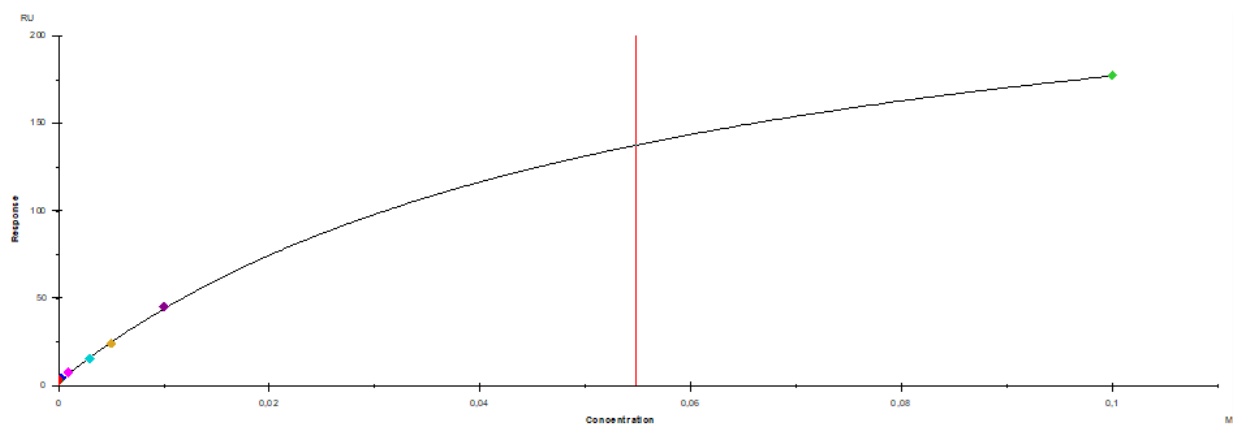

(c)

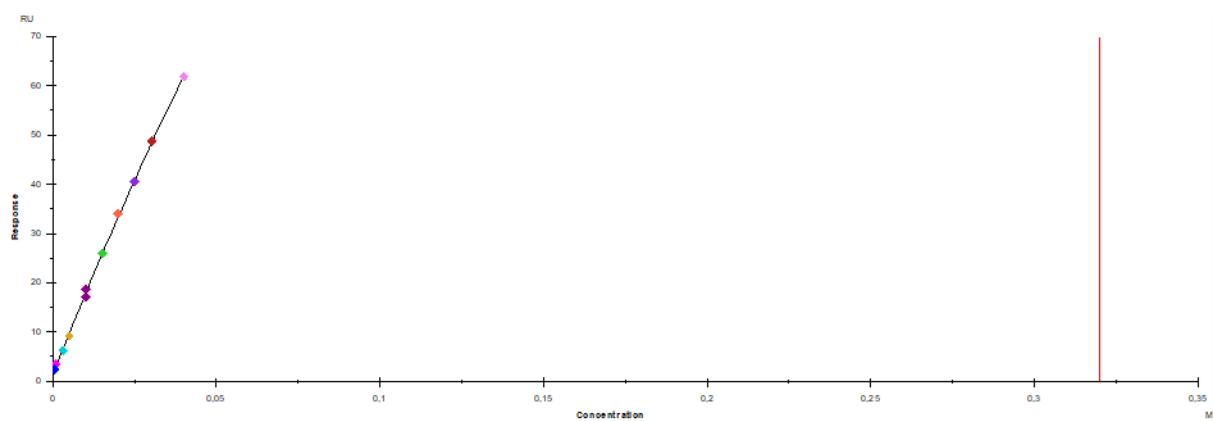

**Supplemental Figure 5** Kinetic profiles of EACA (a), t-AMCHA (b) and NAG (c) on KIV-2. On the y axis the Response in RUs, on the x axis the analyte concentration.

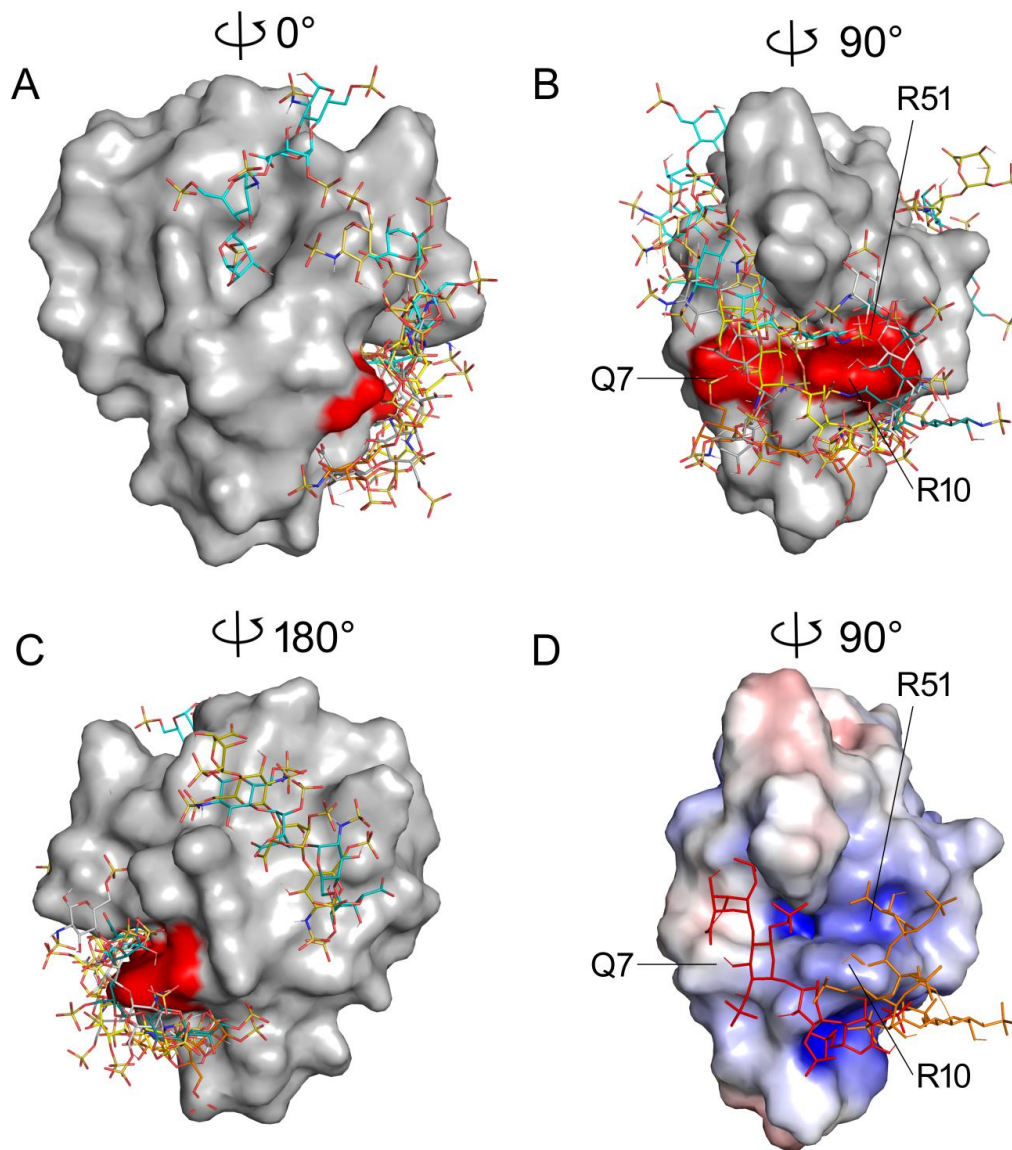

**Supplemental Figure. 6** Prediction of heparin binding to KIV-2. Panels A to C: The top 10 models obtained by ClusPro prediction are reported. KIV-2 is shown as surface (grey) and different heparin molecules are shown as sticks of different colors. In red: Q7, R10 and R51 residues replaced by Glu in the KIV2 triple negative mutant. Panel D: the top 2 models obtained by CONSRank are represented as sticks, KIV2 is colored by surface charge, with blue indicating a positive surface charge. The mutated residues Q7, R10 and R51 are labelled.



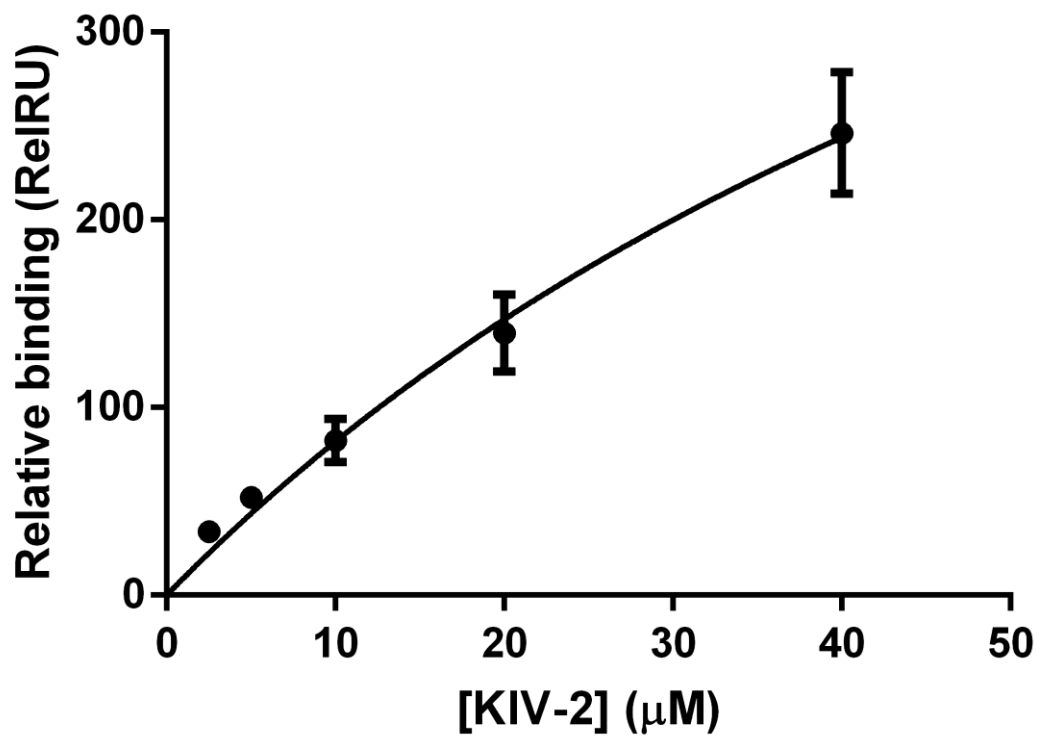

(a)

(b)

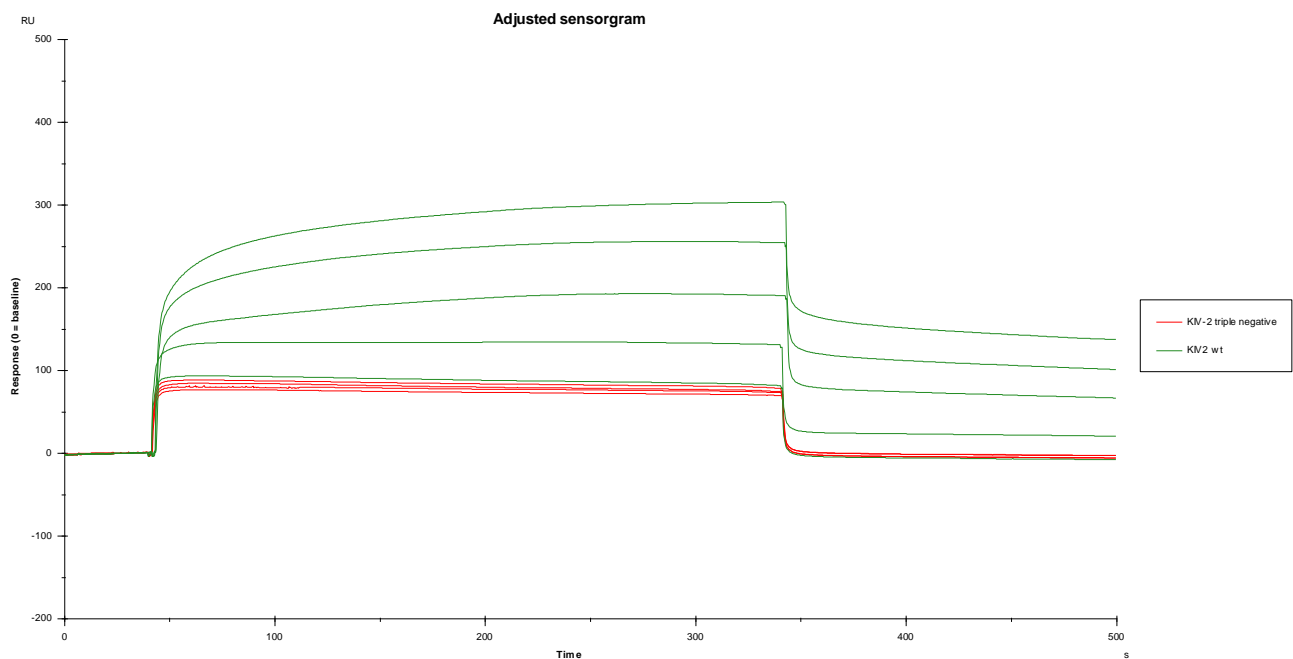

**Supplemental Figure 7** KIV2 affinity for heparin: (a)  $K_D$  determination for KIV-2 wild-type and (b) SPR sensorgrams of KIV-2 wt (green) versus KIV-2 triple mutant (red).

(a)

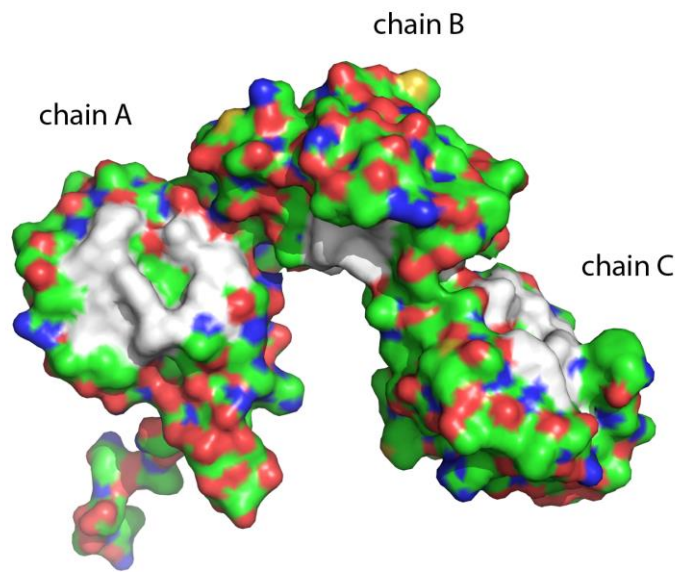

(b)

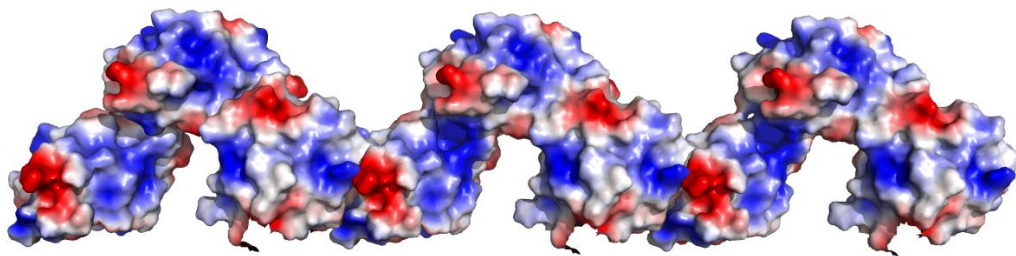

**Supplemental Figure 8** Surface representation of the trimeric asymmetric unit of KIV-2 (a, in white: LBS) and of the KIV-2 tandem repeat protein chain (b, electrostatic charges) generated by crystal contacts (three asymmetric units are represented, linker regions were removed for clarity).

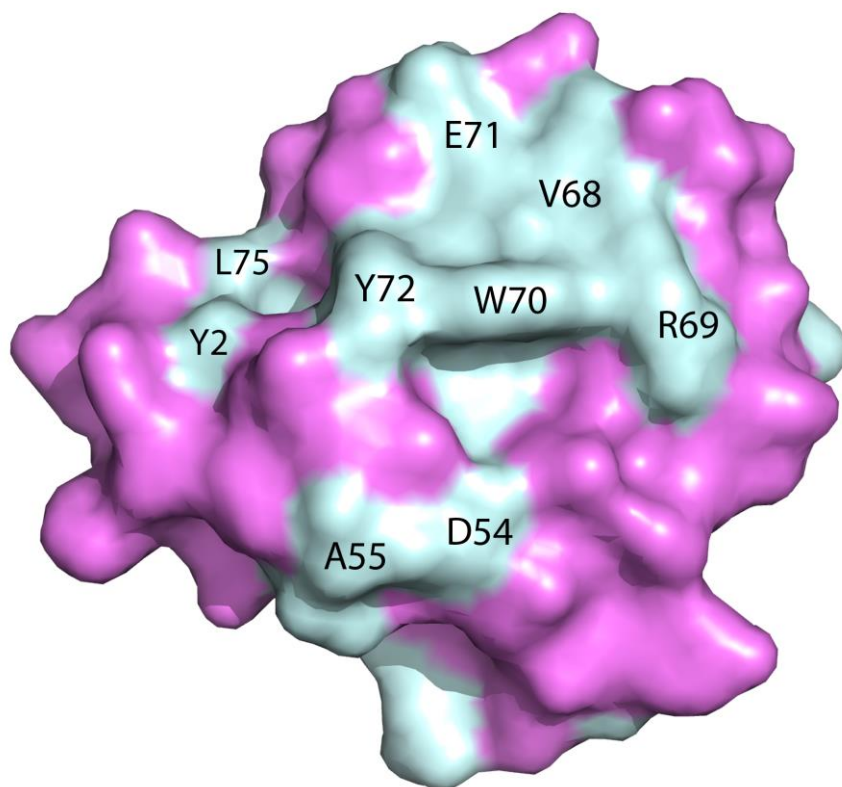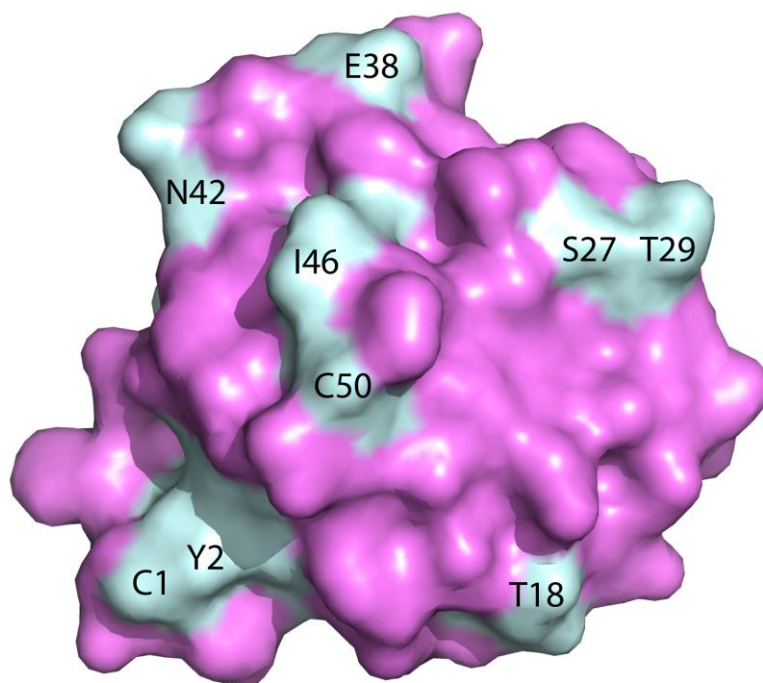

**Supplemental Figure 9** Front and rear view of the absolutely conserved (light blue, labelled) and variable (purple) residues in KIV-2 [2].

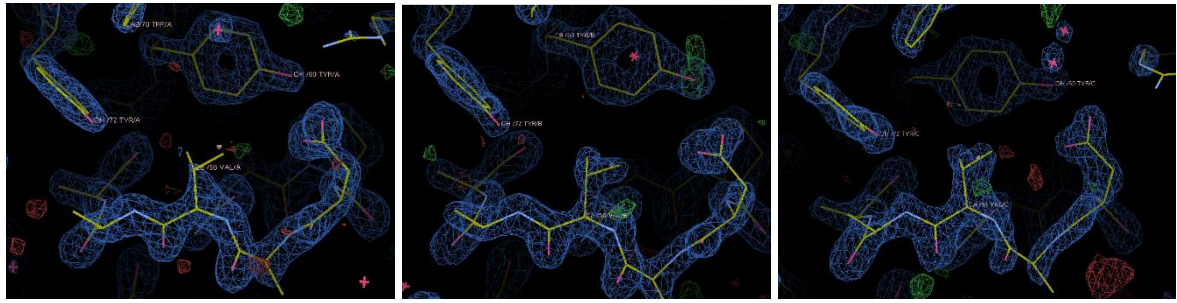

**Supplemental Figure 10** Electron density of Val56. From left to right: chains A, B and C of KIV-2.

## References

1. Heinig, M. and D. Frishman, *STRIDE: a web server for secondary structure assignment from known atomic coordinates of proteins*. Nucleic Acids Res, 2004. **32**(Web Server issue): p. W500-2.
2. Coassin, S., et al., *A comprehensive map of single-base polymorphisms in the hypervariable LPA kringle IV type 2 copy number variation region*. J Lipid Res, 2019. **60**(1): p. 186-199.
